# Supplementary material for: Theoretical perspective on the electronic structure and photophysical properties for a series of mixed-carbene tris-cyclometalated iridium(iii) complexes
Source: Royal Society of Chemistry journal article supplement (doi:10.1039/d0ra03444d), 2020-01-01
Supplement: d0ra03444d1.pdf [file d0ra03444d1.pdf]

**Table S1** frontier molecular orbital energies (eV) and compositions (%) in the ground state for complex **1**

| MO   | Energy | Contribution (%) |    |    | Assignment         |
|------|--------|------------------|----|----|--------------------|
|      |        | Ir               | L1 | L2 |                    |
| L+10 | 1.23   | 5                | 5  | 90 | $\pi^*(L2)$        |
| L+9  | 0.81   | 4                | 96 | 1  | $\pi^*(L1)$        |
| L+8  | 0.67   | 4                | 94 | 2  | $\pi^*(L1)$        |
| L+7  | 0.58   | 2                | 95 | 2  | $\pi^*(L1)$        |
| L+6  | 0.48   | 4                | 63 | 33 | $\pi^*(L1+L2)$     |
| L+5  | 0.41   | 3                | 37 | 60 | $\pi^*(L1+L2)$     |
| L+4  | 0.01   | 1                | 95 | 4  | $\pi^*(L1)$        |
| L+3  | -0.11  | 1                | 99 | 0  | $\pi^*(L1)$        |
| L+2  | -0.24  | 3                | 8  | 89 | $\pi^*(L2)$        |
| L+1  | -0.49  | 4                | 94 | 2  | $\pi^*(L1)$        |
| L    | -0.58  | 4                | 94 | 2  | $\pi^*(L1)$        |
| H    | -5.25  | 36               | 57 | 7  | $d(Ir)+\pi(L1)$    |
| H-1  | -5.65  | 29               | 31 | 40 | $d(Ir)+\pi(L1+L2)$ |
| H-2  | -5.91  | 8                | 73 | 19 | $\pi(L1+L2)$       |
| H-3  | -6.05  | 6                | 72 | 22 | $\pi(L1+L2)$       |
| H-4  | -6.23  | 18               | 64 | 18 | $d(Ir)+\pi(L1+L2)$ |
| H-5  | -6.38  | 10               | 37 | 53 | $\pi(L1+L2)$       |
| H-6  | -6.46  | 17               | 75 | 8  | $d(Ir)+\pi(L1)$    |
| H-7  | -6.67  | 2                | 71 | 27 | $\pi(L1+L2)$       |
| H-8  | -6.90  | 4                | 62 | 35 | $\pi(L1+L2)$       |
| H-9  | -6.99  | 18               | 58 | 24 | $d(Ir)+\pi(L1+L2)$ |
| H-10 | -7.22  | 4                | 95 | 1  | $\pi(L1)$          |

**Table S2** Frontier molecular orbital energies (eV) and compositions (%) in the ground state for complex **2**

| MO   | Energy | Contribution (%) |    |    | Assignment         |
|------|--------|------------------|----|----|--------------------|
|      |        | Ir               | L1 | L2 |                    |
| L+10 | 0.53   | 2                | 96 | 2  | $\pi^*(L1)$        |
| L+9  | 0.43   | 4                | 7  | 89 | $\pi^*(L2)$        |
| L+8  | 0.29   | 0                | 97 | 2  | $\pi^*(L1)$        |
| L+7  | 0.21   | 0                | 99 | 1  | $\pi^*(L1)$        |
| L+6  | 0.17   | 0                | 99 | 0  | $\pi^*(L1)$        |
| L+5  | 0.08   | 1                | 99 | 1  | $\pi^*(L1)$        |
| L+4  | -0.24  | 3                | 8  | 89 | $\pi^*(L2)$        |
| L+3  | -0.40  | 1                | 98 | 1  | $\pi^*(L1)$        |
| L+2  | -0.48  | 1                | 96 | 3  | $\pi^*(L1)$        |
| L+1  | -0.63  | 3                | 94 | 2  | $\pi^*(L1)$        |
| L    | -0.74  | 3                | 96 | 1  | $\pi^*(L1)$        |
| H    | -5.29  | 32               | 62 | 6  | $d(Ir)+\pi(L1)$    |
| H-1  | -5.62  | 20               | 60 | 20 | $d(Ir)+\pi(L1+L2)$ |
| H-2  | -5.82  | 12               | 49 | 39 | $d(Ir)+\pi(L1+L2)$ |
| H-3  | -5.93  | 10               | 82 | 8  | $d(Ir)+\pi(L1)$    |
| H-4  | -6.26  | 11               | 60 | 29 | $d(Ir)+\pi(L1+L2)$ |
| H-5  | -6.32  | 21               | 54 | 24 | $d(Ir)+\pi(L1+L2)$ |
| H-6  | -6.40  | 18               | 47 | 35 | $d(Ir)+\pi(L1+L2)$ |
| H-7  | -6.68  | 1                | 64 | 34 | $\pi(L1+L2)$       |
| H-8  | -6.90  | 2                | 88 | 10 | $\pi(L1+L2)$       |
| H-9  | -6.96  | 7                | 67 | 26 | $\pi(L1+L2)$       |
| H-10 | -7.00  | 1                | 94 | 5  | $\pi(L1)$          |

**Table S3** Frontier molecular orbital energies (eV) and compositions (%) in the ground state for complex **3**

| MO   | Energy | Contribution (%) |    |    | Assignment         |
|------|--------|------------------|----|----|--------------------|
|      |        | Ir               | L1 | L2 |                    |
| L+10 | 0.65   | 2                | 96 | 2  | $\pi^*(L1)$        |
| L+9  | 0.44   | 4                | 18 | 78 | $\pi^*(L1+L2)$     |
| L+8  | 0.38   | 1                | 88 | 11 | $\pi^*(L1+L2)$     |
| L+7  | 0.32   | 0                | 96 | 4  | $\pi^*(L1)$        |
| L+6  | 0.11   | 1                | 99 | 0  | $\pi^*(L1)$        |
| L+5  | 0.00   | 1                | 99 | 1  | $\pi^*(L1)$        |
| L+4  | -0.23  | 3                | 7  | 90 | $\pi^*(L2)$        |
| L+3  | -0.41  | 2                | 97 | 1  | $\pi^*(L1)$        |
| L+2  | -0.49  | 1                | 95 | 4  | $\pi^*(L1)$        |
| L+1  | -0.66  | 3                | 95 | 2  | $\pi^*(L1)$        |
| L    | -0.76  | 3                | 97 | 1  | $\pi^*(L1)$        |
| H    | -5.15  | 28               | 68 | 5  | $d(Ir)+\pi(L1)$    |
| H-1  | -5.48  | 10               | 85 | 6  | $\pi(L1)$          |
| H-2  | -5.74  | 23               | 25 | 53 | $d(Ir)+\pi(L1+L2)$ |
| H-3  | -5.79  | 11               | 81 | 8  | $d(Ir)+\pi(L1)$    |
| H-4  | -6.22  | 16               | 62 | 23 | $d(Ir)+\pi(L1+L2)$ |
| H-5  | -6.29  | 19               | 59 | 23 | $d(Ir)+\pi(L1+L2)$ |
| H-6  | -6.35  | 16               | 48 | 36 | $d(Ir)+\pi(L1+L2)$ |
| H-7  | -6.61  | 3                | 62 | 35 | $\pi(L1+L2)$       |
| H-8  | -6.85  | 1                | 78 | 21 | $\pi(L1+L2)$       |
| H-9  | -6.90  | 2                | 92 | 6  | $\pi(L2)$          |
| H-10 | -6.91  | 1                | 96 | 3  | $\pi(L2)$          |

**Table S4** Frontier molecular orbital energies (eV) and compositions (%) in the ground state for complex 4

| MO   | Energy | Contribution (%) |    |    | Assignment         |
|------|--------|------------------|----|----|--------------------|
|      |        | Ir               | L1 | L2 |                    |
| L+10 | 0.67   | 4                | 94 | 2  | $\pi^*(L1)$        |
| L+9  | 0.33   | 2                | 54 | 44 | $\pi^*(L1+L2)$     |
| L+8  | 0.30   | 2                | 79 | 19 | $\pi^*(L1+L2)$     |
| L+7  | 0.24   | 1                | 76 | 23 | $\pi^*(L1+L2)$     |
| L+6  | 0.22   | 1                | 94 | 6  | $\pi^*(L1)$        |
| L+5  | 0.11   | 2                | 97 | 0  | $\pi^*(L1)$        |
| L+4  | -0.16  | 3                | 93 | 3  | $\pi^*(L1)$        |
| L+3  | -0.34  | 2                | 84 | 14 | $\pi^*(L1+L2)$     |
| L+2  | -0.36  | 3                | 22 | 76 | $\pi^*(L1+L2)$     |
| L+1  | -0.59  | 4                | 95 | 1  | $\pi^*(L1)$        |
| L    | -0.66  | 4                | 92 | 5  | $\pi^*(L1)$        |
| H    | -5.06  | 18               | 80 | 2  | $d(Ir)+\pi(L1)$    |
| H-1  | -5.44  | 4                | 93 | 3  | $\pi(L1)$          |
| H-2  | -5.90  | 22               | 15 | 63 | $d(Ir)+\pi(L1+L2)$ |
| H-3  | -6.09  | 11               | 84 | 5  | $d(Ir)+\pi(L1)$    |
| H-4  | -6.37  | 16               | 60 | 24 | $d(Ir)+\pi(L1+L2)$ |
| H-5  | -6.43  | 5                | 79 | 16 | $\pi(L1+L2)$       |
| H-6  | -6.48  | 17               | 73 | 10 | $d(Ir)+\pi(L1+L2)$ |
| H-7  | -6.73  | 4                | 36 | 61 | $\pi(L1+L2)$       |
| H-8  | -6.93  | 1                | 98 | 1  | $\pi(L1)$          |
| H-9  | -6.99  | 1                | 99 | 1  | $\pi(L1)$          |
| H-10 | -7.16  | 6                | 50 | 44 | $\pi(L1+L2)$       |

**Table S5** Selected calculated wavelength (nm) / energies (eV), oscillator strength ( $f$ ), major contribution and transition characters for complexes **1–4** in CH<sub>2</sub>Cl<sub>2</sub> media at TDDFT/M052X level. (H and L indicate HOMO and LUMO, respectively.)

|                 | State           | $\lambda/E$ | $f$            | Configuration                      | Assignment                         | Nature                             | Exptl. <sup>a</sup>                |
|-----------------|-----------------|-------------|----------------|------------------------------------|------------------------------------|------------------------------------|------------------------------------|
| <b>1</b>        | S <sub>1</sub>  | 328/3.78    | 0.0104         | H→L (93%)                          | d(Ir)+ $\pi$ (L1)→ $\pi^*$ (L1)    | MLCT/ILCT                          | 302                                |
|                 | S <sub>5</sub>  | 288/4.31    | 0.1610         | H-1→L+1 (81%)                      | d(Ir)+ $\pi$ (L1+L2)→ $\pi^*$ (L1) | MLCT/LLCT/ILCT                     |                                    |
|                 | S <sub>7</sub>  | 278/4.46    | 0.1450         | H-2→L (10%)                        | $\pi$ (L1+L2)→ $\pi^*$ (L1)        | LLCT/ILCT                          |                                    |
|                 |                 |             |                | H→L+4 (69%)                        | d(Ir)+ $\pi$ (L1)→ $\pi^*$ (L1)    | MLCT/ILCT                          |                                    |
|                 | S <sub>15</sub> | 257/4.82    | 0.1490         | H-2→L+2 (25%)                      | $\pi$ (L1+L2)→ $\pi^*$ (L2)        | LLCT/ILCT                          |                                    |
|                 |                 |             |                | H→L+5 (16%)                        | d(Ir)+ $\pi$ (L1)→ $\pi^*$ (L1+L2) | MLCT/LLCT/ILCT                     |                                    |
|                 |                 |             |                | H→L+6 (23%)                        | d(Ir)+ $\pi$ (L1)→ $\pi^*$ (L1+L2) | MLCT/LLCT/ILCT                     |                                    |
|                 | S <sub>26</sub> | 242/5.12    | 0.1122         | H-4→L+2 (11%)                      | d(Ir)+ $\pi$ (L1+L2)→ $\pi^*$ (L2) | MLCT/LLCT/ILCT                     |                                    |
|                 |                 |             |                | H→L+8 (41%)                        | d(Ir)+ $\pi$ (L1)→ $\pi^*$ (L1)    | MLCT/ILCT                          |                                    |
|                 | S <sub>31</sub> | 237/5.23    | 0.1849         | H-6→L+1 (20%)                      | d(Ir)+ $\pi$ (L1)→ $\pi^*$ (L1)    | MLCT/ILCT                          |                                    |
|                 |                 |             |                | H-2→L+4 (26%)                      | $\pi$ (L1+L2)→ $\pi^*$ (L1)        | LLCT/ILCT                          |                                    |
|                 |                 |             |                | H→L+9 (13%)                        | d(Ir)+ $\pi$ (L1)→ $\pi^*$ (L1)    | MLCT/ILCT                          |                                    |
|                 | S <sub>36</sub> | 231/5.37    | 0.2078         | H-5→L+2 (21%)                      | $\pi$ (L1+L2)→ $\pi^*$ (L2)        | LLCT/ILCT                          |                                    |
|                 |                 |             |                | H-3→L+4 (37%)                      | $\pi$ (L1+L2)→ $\pi^*$ (L1)        | LLCT/ILCT                          |                                    |
|                 | S <sub>39</sub> | 228/5.44    | 0.1923         | H-7→L+1 (14%)                      | $\pi$ (L1+L2)→ $\pi^*$ (L1)        | LLCT/ILCT                          |                                    |
|                 |                 |             |                | H-1→L+7 (12%)                      | d(Ir)+ $\pi$ (L1+L2)→ $\pi^*$ (L1) | MLCT/LLCT/ILCT                     |                                    |
|                 | S <sub>43</sub> | 225/5.51    | 0.1020         | H-9→L (11%), H-4→L+4 (10%)         | d(Ir)+ $\pi$ (L1+L2)→ $\pi^*$ (L1) | MLCT/LLCT/ILCT                     |                                    |
|                 |                 |             |                | H-3→L+5 (10%)                      | $\pi$ (L1+L2)→ $\pi^*$ (L1+L2)     | LLCT/ILCT                          |                                    |
|                 |                 |             |                | H-2→L+6 (16%)                      | $\pi$ (L1+L2)→ $\pi^*$ (L1+L2)     | LLCT/ILCT                          |                                    |
|                 | S <sub>48</sub> | 223/5.57    | 0.1014         | H-1→L+9 (11%)                      | d(Ir)+ $\pi$ (L1+L2)→ $\pi^*$ (L1) | MLCT/LLCT/ILCT                     |                                    |
| S <sub>43</sub> |                 |             |                | 237/5.23                           | 0.1119                             | H-1→L+6 (14%)                      | d(Ir)+ $\pi$ (L1+L2)→ $\pi^*$ (L1) |
| S <sub>54</sub> | 231/5.38        | 0.1024      | H-4→L+4 (10%)  | d(Ir)+ $\pi$ (L1+L2)→ $\pi^*$ (L2) | MLCT/LLCT/ILCT                     |                                    |                                    |
|                 |                 |             | H-1→L+7 (13%)  | d(Ir)+ $\pi$ (L1+L2)→ $\pi^*$ (L1) | MLCT/LLCT/ILCT                     |                                    |                                    |
| S <sub>56</sub> | 229/5.42        | 0.1485      | H-6→L+4 (21%)  | d(Ir)+ $\pi$ (L1+L2)→ $\pi^*$ (L2) | MLCT/LLCT/ILCT                     |                                    |                                    |
|                 |                 |             | H-1→L+8 (13%)  | d(Ir)+ $\pi$ (L1+L2)→ $\pi^*$ (L1) | MLCT/LLCT/ILCT                     |                                    |                                    |
|                 |                 |             | H-1→L+10 (12%) | d(Ir)+ $\pi$ (L1+L2)→ $\pi^*$ (L1) | MLCT/LLCT/ILCT                     |                                    |                                    |
| <b>2</b>        | S <sub>1</sub>  | 335/3.70    | 0.0258         | H→L (91%)                          | d(Ir)+ $\pi$ (L1)→ $\pi^*$ (L1)    | MLCT/ILCT                          |                                    |
|                 | S <sub>7</sub>  | 294/4.22    | 0.1426         | H-1→L+1 (54%)                      | d(Ir)+ $\pi$ (L1+L2)→ $\pi^*$ (L1) | MLCT/LLCT/ILCT                     |                                    |
|                 |                 |             |                | H→L+3 (24%)                        | d(Ir)+ $\pi$ (L1)→ $\pi^*$ (L1)    | MLCT/ILCT                          |                                    |
|                 | S <sub>8</sub>  | 287/4.31    | 0.1741         | H-3→L (24%)                        | d(Ir)+ $\pi$ (L1)→ $\pi^*$ (L1)    | MLCT/ILCT                          |                                    |
|                 |                 |             |                | H-2→L (62%)                        | d(Ir)+ $\pi$ (L1+L2)→ $\pi^*$ (L1) | MLCT/LLCT/ILCT                     |                                    |
|                 | S <sub>9</sub>  | 279/4.44    | 0.1158         | H-2→L+1 (72%)                      | d(Ir)+ $\pi$ (L1+L2)→ $\pi^*$ (L1) | MLCT/LLCT/ILCT                     |                                    |
|                 | S <sub>11</sub> | 276/4.49    | 0.1687         | H-3→L (27%)                        | d(Ir)+ $\pi$ (L1)→ $\pi^*$ (L1)    | MLCT/ILCT                          |                                    |
|                 |                 |             |                | H-2→L (15%)                        | d(Ir)+ $\pi$ (L1+L2)→ $\pi^*$ (L1) | MLCT/LLCT/ILCT                     |                                    |
|                 |                 |             |                | H-2→L+1 (15%)                      | d(Ir)+ $\pi$ (L1+L2)→ $\pi^*$ (L1) | MLCT/LLCT/ILCT                     |                                    |
|                 |                 |             |                |                                    | H-1→L+2 (28%)                      | d(Ir)+ $\pi$ (L1+L2)→ $\pi^*$ (L1) | MLCT/LLCT/ILCT                     |

|          |                 |           |        |               |                       |                |
|----------|-----------------|-----------|--------|---------------|-----------------------|----------------|
|          | S <sub>13</sub> | 273/4.55  | 0.1511 | H-3→L+1 (51%) | d(Ir)+π(L1)→π*(L1)    | MLCT/ILCT      |
|          |                 |           |        | H-1→L+3 (15%) | d(Ir)+π(L1+L2)→π*(L1) | MLCT/LLCT/ILCT |
|          | S <sub>17</sub> | 263/4.72  | 0.1722 | H-2→L+2 (12%) | d(Ir)+π(L1+L2)→π*(L1) | MLCT/LLCT/ILCT |
|          |                 |           |        | H→L+5 (37%)   | d(Ir)+π(L1)→π*(L1)    | MLCT/ILCT      |
|          |                 |           |        | H→L+7 (13%)   | d(Ir)+π(L1)→π*(L1)    | MLCT/ILCT      |
|          | S <sub>25</sub> | 255/4.86  | 0.1263 | H-3→L+3 (15%) | d(Ir)+π(L1)→π*(L1)    | MLCT/ILCT      |
|          |                 |           |        | H-2→L+4 (13%) | d(Ir)+π(L1+L2)→π*(L2) | MLCT/LLCT/ILCT |
|          |                 |           |        | H→L+9 (21%)   | d(Ir)+π(L1)→π*(L2)    | MLCT/LLCT      |
|          | S <sub>34</sub> | 247/5.02  | 0.1930 | H-6→L+1 (17%) | d(Ir)+π(L1+L2)→π*(L1) | MLCT/LLCT/ILCT |
|          |                 |           |        | H-4→L+2 (10%) | d(Ir)+π(L1+L2)→π*(L1) | MLCT/LLCT/ILCT |
|          |                 |           |        | H→L+10 (28%)  | d(Ir)+π(L1)→π*(L1)    | MLCT/ILCT      |
|          | S <sub>43</sub> | 237/5.24  | 0.1130 | H-1→L+8 (24%) | d(Ir)+π(L1+L2)→π*(L1) | MLCT/LLCT/ILCT |
| <b>3</b> | S <sub>1</sub>  | 345/3.59  | 0.0332 | H→L (87%)     | d(Ir)+π(L1)→π*(L1)    | MLCT/ILCT      |
|          | S <sub>2</sub>  | 338/3.67  | 0.1349 | H→L+1 (87%)   | d(Ir)+π(L1)→π*(L1)    | MLCT/ILCT      |
|          | S <sub>3</sub>  | 313/3.95  | 0.1247 | H-1→L (11%)   | π(L1)→π*(L1)          | ILCT           |
|          |                 |           |        | H→L+2 (71%)   | d(Ir)+π(L1)→π*(L1)    | MLCT/ILCT      |
|          |                 |           |        | H→L+4 (10%)   | d(Ir)+π(L1)→π*(L2)    | MLCT/LLCT      |
|          | S <sub>4</sub>  | 311/3.99  | 0.1678 | H-1→L (75%)   | π(L1)→π*(L1)          | ILCT           |
|          | S <sub>5</sub>  | 310/4.00  | 0.1202 | H→L+3 (65%)   | d(Ir)+π(L1)→π*(L1)    | MLCT/ILCT      |
|          |                 |           |        | H→L+4 (22%)   | d(Ir)+π(L1)→π*(L2)    | MLCT/LLCT      |
|          | S <sub>7</sub>  | 302/4.11  | 0.1534 | H-1→L+1 (72%) | π(L1)→π*(L1)          | ILCT           |
|          | S <sub>8</sub>  | 295/4.21  | 0.1856 | H-3→L (18%)   | d(Ir)+π(L1)→π*(L1)    | MLCT/ILCT      |
|          |                 |           |        | H-2→L (68%)   | d(Ir)+π(L1+L2)→π*(L1) | MLCT/LLCT/ILCT |
|          | S <sub>9</sub>  | 287/4.32  | 0.1055 | H-3→L (30%)   | d(Ir)+π(L1)→π*(L1)    | MLCT/ILCT      |
|          |                 |           |        | H-2→L+1 (44%) | d(Ir)+π(L1+L2)→π*(L1) | MLCT/LLCT/ILCT |
|          | S <sub>12</sub> | 282/4.402 | 0.1332 | H-3→L+1 (61%) | d(Ir)+π(L1)→π*(L1)    | MLCT/ILCT      |
|          | S <sub>18</sub> | 269/4.61  | 0.1718 | H-5→L (18%)   | d(Ir)+π(L1+L2)→π*(L1) | MLCT/LLCT/ILCT |
|          |                 |           |        | H-4→L (29%)   | d(Ir)+π(L1+L2)→π*(L1) | MLCT/LLCT/ILCT |
|          |                 |           |        | H-3→L+2 (10%) | d(Ir)+π(L1)→π*(L1)    | MLCT/ILCT      |
|          |                 |           |        | H-2→L+2 (11%) | d(Ir)+π(L1+L2)→π*(L1) | MLCT/LLCT/ILCT |
|          |                 |           |        | H→L+5 (10%)   | d(Ir)+π(L1)→π*(L1)    | MLCT/ILCT      |
|          | S <sub>24</sub> | 262/4.73  | 0.1002 | H-3→L+3 (22%) | d(Ir)+π(L1)→π*(L1)    | MLCT/ILCT      |
|          |                 |           |        | H→L+9 (22%)   | d(Ir)+π(L1)→π*(L1+L2) | MLCT/LLCT/ILCT |
|          | S <sub>43</sub> | 237/5.24  | 0.1130 | H-1→L+8 (24%) | d(Ir)+π(L1+L2)→π*(L1) | MLCT/LLCT/ILCT |
| <b>4</b> | S <sub>1</sub>  | 347/3.58  | 0.0391 | H→L (59%)     | d(Ir)+π(L1)→π*(L1)    | MLCT/ILCT      |
|          |                 |           |        | H→L+1 (35%)   | d(Ir)+π(L1)→π*(L1)    | MLCT/ILCT      |
|          | S <sub>4</sub>  | 311/3.99  | 0.1013 | H-1→L (72%)   | π(L1)→π*(L1)          | ILCT           |
|          |                 |           |        | H→L+3 (21%)   | d(Ir)+π(L1)→π*(L1+L2) | MLCT/LLCT/ILCT |
|          | S <sub>5</sub>  | 310/4.00  | 0.1997 | H-1→L (20%)   | π(L1)→π*(L1)          | ILCT           |
|          |                 |           |        | H→L+2 (10%)   | d(Ir)+π(L1)→π*(L1+L2) | MLCT/LLCT/ILCT |
|          |                 |           |        | H→L+3 (58%)   | d(Ir)+π(L1)→π*(L1+L2) | MLCT/LLCT/ILCT |
|          | S <sub>7</sub>  | 298/4.17  | 0.1244 | H-1→L+1 (21%) | π(L1)→π*(L1)          | ILCT           |
|          |                 |           |        | H→L+4 (66%)   | d(Ir)+π(L1)→π*(L1)    | MLCT/ILCT      |
|          | S <sub>18</sub> | 267/4.64  | 0.1021 | H-1→L+4 (29%) | π(L1)→π*(L1)          | ILCT           |

|                 |          |        |               |                       |                |
|-----------------|----------|--------|---------------|-----------------------|----------------|
| S <sub>19</sub> | 267/4.65 | 0.1287 | H→L+9 (38%)   | d(Ir)+π(L1)→π*(L1+L2) | MLCT/LLCT/ILCT |
|                 |          |        | H-3→L (62%)   | d(Ir)+π(L1)→π*(L1)    | MLCT/ILCT      |
| S <sub>20</sub> | 262/4.74 | 0.1107 | H-3→L+1 (13%) | d(Ir)+π(L1)→π*(L1)    | MLCT/ILCT      |
|                 |          |        | H-3→L (19%)   | d(Ir)+π(L1)→π*(L1)    | MLCT/ILCT      |
| S <sub>22</sub> | 256/4.85 | 0.1935 | H-3→L+1 (53%) | d(Ir)+π(L1)→π*(L1)    | MLCT/ILCT      |
|                 |          |        | H-6→L (18%)   | d(Ir)+π(L1+L2)→π*(L1) | MLCT/LLCT/ILCT |
| S <sub>27</sub> | 249/4.97 | 0.1177 | H-4→L (32%)   | d(Ir)+π(L1+L2)→π*(L1) | MLCT/LLCT/ILCT |
|                 |          |        | H→L+7 (10%)   | d(Ir)+π(L1)→π*(L1+L2) | MLCT/LLCT/ILCT |
|                 |          |        | H-4→L+1 (30%) | d(Ir)+π(L1+L2)→π*(L1) | MLCT/LLCT/ILCT |
| S <sub>29</sub> | 248/5.00 | 0.1152 | H→L+10 (12%)  | d(Ir)+π(L1)→π*(L1)    | MLCT/ILCT      |
|                 |          |        | H-5→L (10%)   | π(L1+L2)→π*(L1)       | LLCT/ILCT      |
|                 |          |        | H-4→L+1 (16%) | d(Ir)+π(L1+L2)→π*(L1) | MLCT/LLCT/ILCT |
|                 |          |        | H-2→L+4 (11%) | d(Ir)+π(L1+L2)→π*(L1) | MLCT/LLCT/ILCT |
|                 |          |        | H-1→L+7 (14%) | π(L1)→π*(L1+L2)       | LLCT/ILCT      |

<sup>a</sup> Ref. 18

**Table S6** Partial frontier molecular orbital composition (%) of complexes **1–4** in the triplet excited states. (H and L indicate HOMO and LUMO, respectively)

|          | MO | Energy<br>(eV) | Composition (%) |    |    | Assignment      |
|----------|----|----------------|-----------------|----|----|-----------------|
|          |    |                | Ir              | L1 | L2 |                 |
| <b>1</b> | L  | -1.00          | 7               | 92 | 1  | $\pi^*(L1)$     |
|          | H  | -4.90          | 33              | 59 | 9  | $d(Ir)+\pi(L1)$ |
| <b>2</b> | L  | -1.27          | 2               | 98 | 1  | $\pi^*(L1)$     |
|          | H  | -5.15          | 20              | 78 | 3  | $d(Ir)+\pi(L1)$ |
| <b>3</b> | L  | -1.07          | 2               | 98 | 1  | $\pi^*(L1)$     |
|          | H  | -5.03          | 19              | 78 | 2  | $d(Ir)+\pi(L1)$ |
| <b>4</b> | L  | -0.80          | 6               | 89 | 5  | $\pi^*(L1)$     |
|          | H  | -4.79          | 14              | 83 | 2  | $d(Ir)+\pi(L1)$ |



**Table S7** The metal-based charge transfer character (<sup>3</sup>MLCT) (%) and the energy differences of S<sub>1</sub>-T<sub>1</sub> (in eV), along with the transition dipole moment in the S<sub>0</sub>→S<sub>1</sub> transition  $\mu_{S_1}$ , together with the measured quantum yields  $\Phi$  [%] for complexes **1–4** in CH<sub>2</sub>Cl<sub>2</sub> medium.

|          | <sup>3</sup> MLCT | $\Delta E_{S_1-T_1}$ | $\mu_{S_1}$ | $\Phi^a$ |
|----------|-------------------|----------------------|-------------|----------|
| <b>1</b> | 21.76             | 0.371                | 0.119       | 0.31     |
| <b>2</b> | 23.78             | 1.193                | 0.285       |          |
| <b>3</b> | 19.75             | 1.117                | 0.377       |          |
| <b>4</b> | 11.62             | 1.836                | 0.446       |          |

<sup>a</sup>Ref. 18
